# Supplementary material for: Immune cell populations and induced immune responses at admission in patients hospitalized with vaccine breakthrough SARS-CoV-2 infections
Source: PubMed Central journal article supplement (PMC11188326; doi:10.3389/fimmu.2024.1360843), 2024-06-05
Supplement: Image_1.pdf [file Image_1.pdf]

Supplementary Figure 1 - B-cell lineage percentages

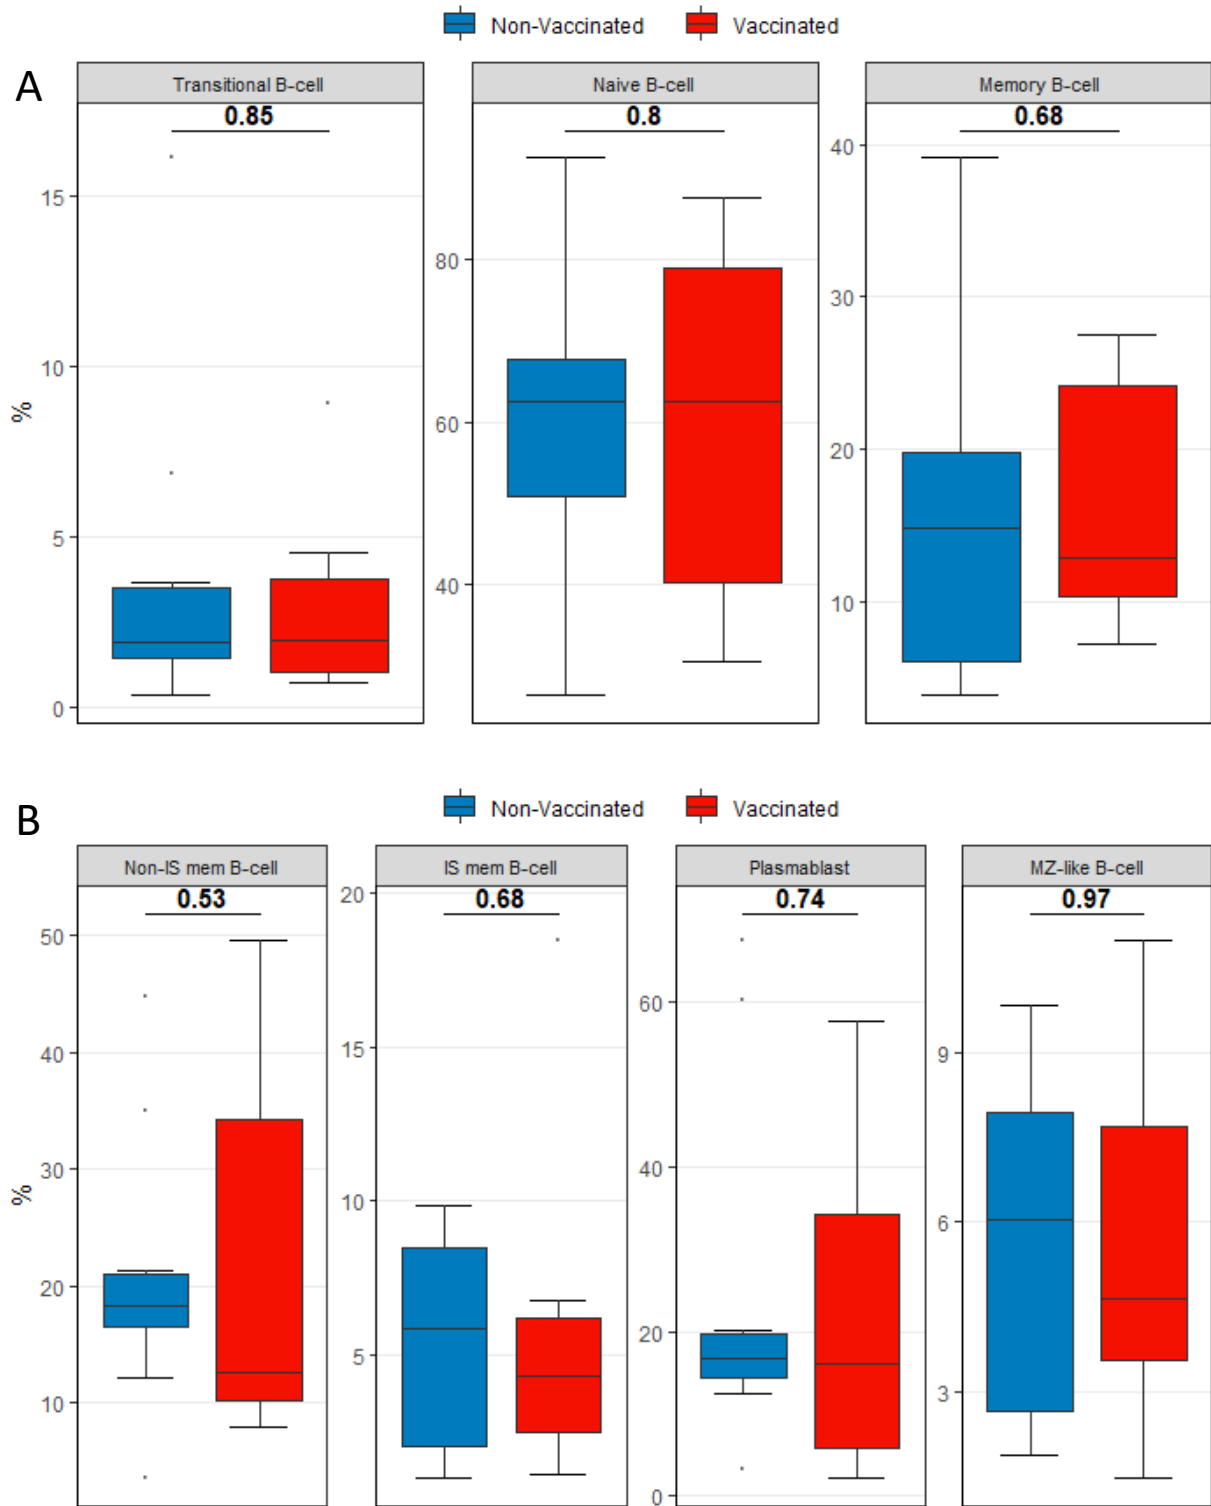

**Supplementary Figure 1.** Boxplots visualizing the difference in the proportions (%) of B cell lineages between vaccinated (red) and non-vaccinated (blue) patients. **A)** The difference in transitional B cells, naïve B cells and memory B cells. **B)** The difference in Non-isotype switch memory B cells, isotype switch memory B cells, plasmablasts and MZ-like B cells. P-values were calculated using Mann-Whitney U tests and displayed at the top of the boxplots.  
\*  $P < 0.05$
