# Supplementary material for: Immune cell populations and induced immune responses at admission in patients hospitalized with vaccine breakthrough SARS-CoV-2 infections
Source: PubMed Central journal article supplement (PMC11188326; doi:10.3389/fimmu.2024.1360843), 2024-06-05
Supplement: Image_2.pdf [file Image_2.pdf]

Supplementary Figure 2 - CD4/CD8 T-cell activation/exhaustion markers percentages

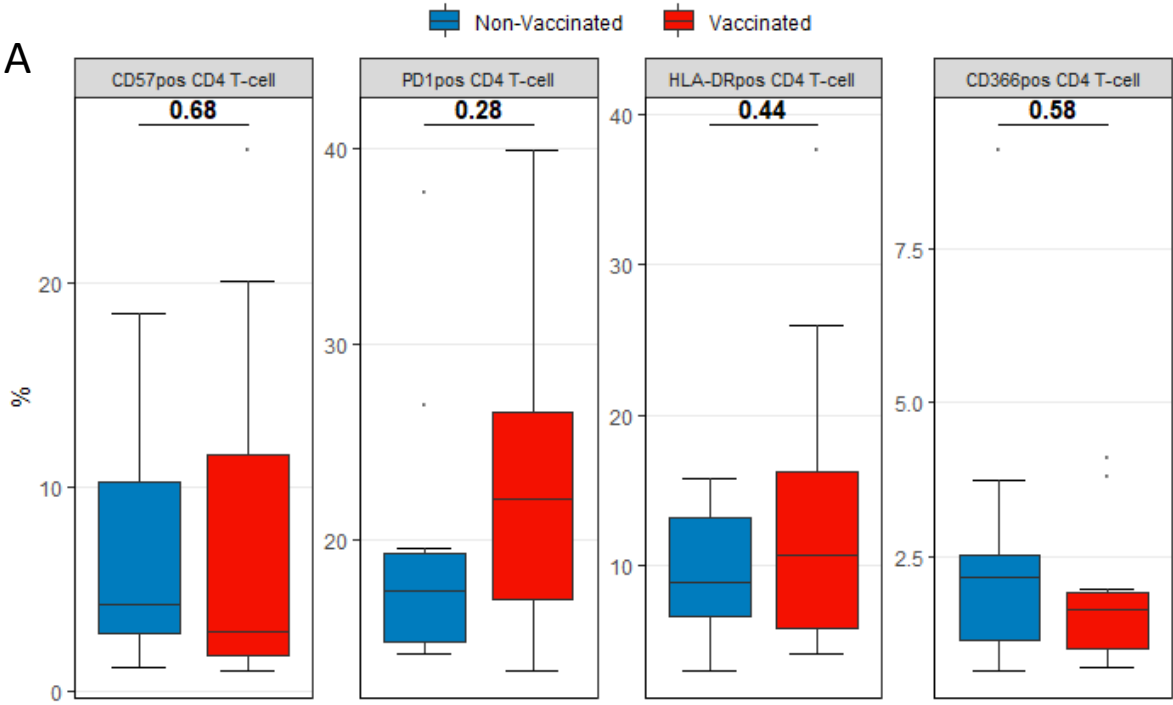

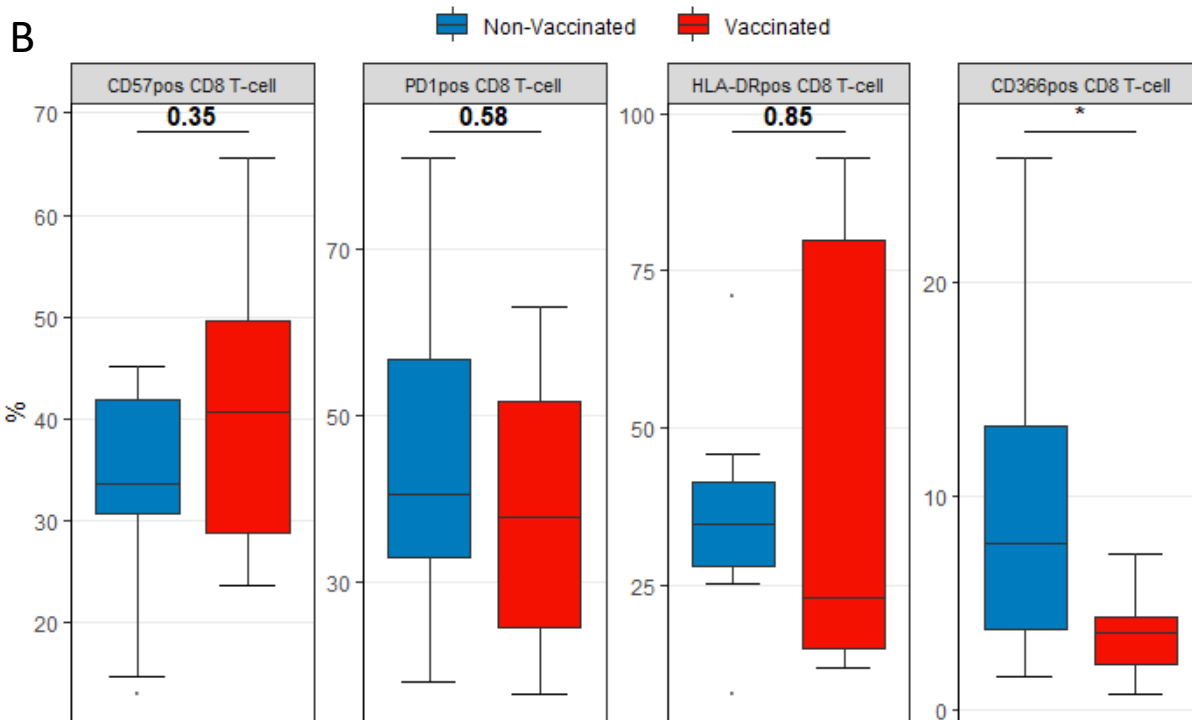

**Supplementary Figure 2.** Boxplots visualizing the difference in the proportions (%) of activation/exhaustion markers on CD4+ and CD8+ T cells between vaccinated (red) and non-vaccinated (blue) patients. **A)** The difference activation/exhaustion markers on CD4+ T cells. **B)** The difference activation/exhaustion markers on CD8 + cells. P-values were calculated using Mann-Whitney U tests and displayed at the top of the boxplots.  
\* P < 0.05
