# Supplementary material for: Immune cell populations and induced immune responses at admission in patients hospitalized with vaccine breakthrough SARS-CoV-2 infections
Source: PubMed Central journal article supplement (PMC11188326; doi:10.3389/fimmu.2024.1360843), 2024-06-05
Supplement: Image_3.pdf [file Image_3.pdf]

### Supplementary Figure 3 - CD8 lineage Percentages

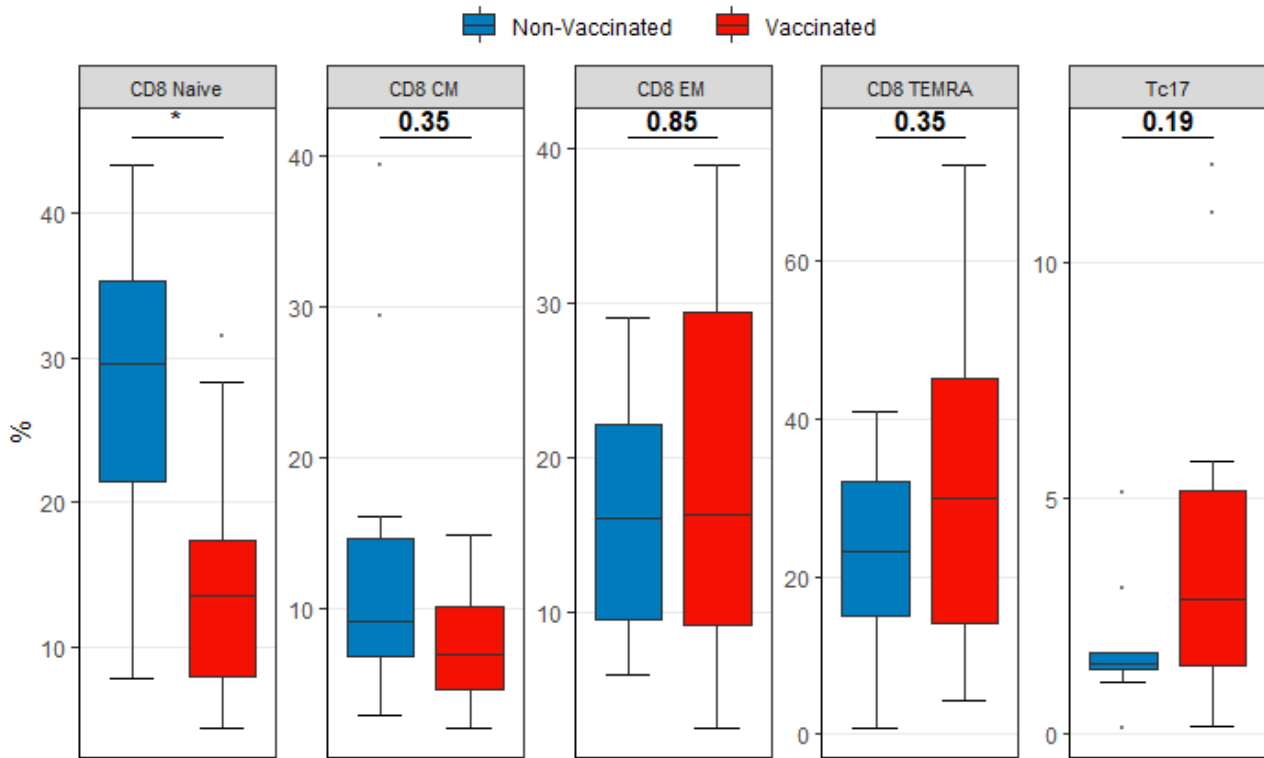

**Supplementary Figure 3.** Boxplots visualizing the difference in the proportions (%) of CD8+ subsets between vaccinated (red) and non-vaccinated (blue) patients. P-values were calculated using Mann-Whitney U tests and displayed at the top of the boxplots. \* P < 0.05
